# Supplementary material for: Acquisition of cellular properties during alveolar formation requires differential activity and distribution of mitochondria
Source: eLife. 2022 Apr 6;11:e68598. doi: 10.7554/eLife.68598 (PMC9183236; doi:10.7554/eLife.68598)
Supplement: Figure 2—source data 1. [file elife-68598-fig2-data1.xlsx]

## Sheet: Figure 2D MLI quantification
Control (µm)	Tfamf/f; CAGCreER (µm)
37.8259	51.165
41.916	50.2536
37.4493	45.0588
43.8526	47.6149
p Value
0.00771085

## Sheet: Figure 2F Relative mtDNA ratio
16S rRNA/Hk2		mtND1/Hk2
Control	Tfamf/f CAG-CreER	Control	Tfamf/f CAG-CreER
1.15118	0.865805	1.2107	0.798299
0.922015	0.716578	1.04828	0.464007
1.1085	0.622125	0.785339	0.643567
0.818312	0.823511	0.955678	0.643584
p VALUE		p VALUE
0.0486248		0.0194872
