# Supplementary material for: Acquisition of cellular properties during alveolar formation requires differential activity and distribution of mitochondria
Source: eLife. 2022 Apr 6;11:e68598. doi: 10.7554/eLife.68598 (PMC9183236; doi:10.7554/eLife.68598)
Supplement: Figure 3—source data 1. [file elife-68598-fig3-data1.xlsx]

## Sheet: Figure 3B MLI quantification
Stage	Control (µm)			Tfamf/f; Sox9Cre (µm)
P3	70.9187	62.0198	70.8151	64.326	60.3959	75.6836		p Value	0.849369
P5	60.3959	67.181	72.5112	72.187	69.8954	70.1993		p Value	0.365983
P7	43.6767	40.7038	45.8254	73.3902	84.2391	73.5015		p Value	0.00508099
P10	41.0836	38.9996	38.2603	74.2906	77.9992	73.0581		p Value	0.000166659

## Sheet: Figure 3C Septal thickness
Stage	P3		P5		P7
	Control (µm)	Tfamf/f; Sox9Cre (µm)	Control (µm)	Tfamf/f; Sox9Cre (µm)	Control (µm)	Tfamf/f; Sox9Cre (µm)
	7.85061	7.2439	9.10671	9.65854	11.4756	5.99085
	6.60671	8.43597	9.64634	7.82012	9.8628	7.11585
	6.23171	6.29878	9.53049	8.73171	9.07317	5.48475
	7.09146	6.57317	9.35671	8.17988	9.55488	7.82012
	6.84451	8.77439	8.48475	5.92988	12.1555	9.85975
	8.73475	9.65549	8.16768	6.87195	12.5732	8.3689
	8.13719	8.73475	7.19207	8.70122	8.80183	6.99695
	6.53963	8.7561	8.82317	6.7561	9.01219	6.50915
	6.45122	6.43598	7.0061	6.29573	10.2866	10.936
	8.71646	7.21646	6.85366	5.62805	9.52134	8.28963
	7.88415	8.86585	8.3811	6.05488	8.53049	6.16158
	8.39024	6.93902	7.76524	9.84146	8	5.68598
	7.03049	7.53353	11.1067	8.51829	9.58841	8.18597
	7.67683	7.55488	8.71646	6.81402	8.8689	6.06098
	8.27134	8.07317	9.00915	8.51219	9.41158	6.60975
	9.37805	6.57317	7.44512	7.64024	10.7256	6.5061
	6.10975	8.52439	8.3689	8.31097	10.1189	6.24085
	8.3689	8.42683	7.90549	6.98475	12.5732	7.67683
	6.53963	8.45122	9.55792	5.77134	7.99695	6.78353
	7.10061	9.14939	10.2439	6.51219	6.90549	6.53963
	6.74085	6.91158	8.16768	6.3628	8.10061	6.29573
	6.75915	7.82622	8.35061	6.09451	9.00305	5.72256
	8.20731	8.19512	7.78353	8.09146	9.53658	10.1372
	8.82622	7.28658	9.36585	6.80183	8.22256	10.0488
	7.52134	6.42073	8.27439	10.4939	8.85366	6.54878
	6.75915	7.82012	9.60975	9.56402	9.82927	8.82927
	7.89939	7.67988	8.94207	8.19207	7.42073	6.89329
	6.44207	6.82012	8.85975	9.47866	8.76829	7.75
	6.125	7.16768	9.54573	9.04878	11.1921	9.66158
	7.4878	8.33231	10.125	9.27744	10.0549	8.72866
	6.75915	6.60671	10.7409	8.42988	8.09756	9.01829
	8.3689	6.30183	8.85366	8.22866	10.4024	8.17988
	6.57622	5.96037	7.73171	7.40244	9.28049	10.1799
	9.89024	8.70731	9.37805	6.57317	8.74085	5.46341
	8.70731	9.47256	8.73475	9.81097	9.82012	5.93598
	9.27744	6.74085	9.59756	8.76829	11.1829	8.45427
	6.97256	8.67378	10.1433	7.70732	8.3689	6.77134
	8.3689	8.02439	8.53049	7.58232	9.58231	8.69207
	7.21646	8.32927	8.13415	6.88415	11.0122	11.686
	11.0793	8.80183	9.7439	9.625	8.40244	10.9482
	6.5061	9.81097	9.59756	9.34451	8.97561	8.40244
	9.58841	8.85366	8.56402	8.37805	10.5549	9.58536
	8.1311	9.58841	8.67988	6.85061	12.5854	9.03049
	6.60671	9.04268	8.7439	6.53963	9.52439	5.65244
	6.09451	8.50915	7.0061	5.78353	9.12805	6.63415
p Value	0.209459		0.000108319		1.60044e-07

## Sheet: Figure 3D Relative mtDNA ratio
16S rRNA/Hk2		mtND1/Hk2
Control	Tfamf/f; Sox9Cre	Control	Tfamf/f; Sox9Cre
1.28749	0.505181	1.12122	0.844839
1.05231	0.641266	0.963475	0.713933
0.801804	0.951336	0.832038	0.897589
0.930513	0.665325	1.10707	0.597975
0.927877	0.468555	0.976198	0.845399
p Value		p Value
0.0173355		0.0202658

## Sheet: Figure 3E Enzymatic activity
Complex Ⅰ		Complex Ⅳ
Control	Tfamf/f; Sox9Cre	Control	Tfamf/f; Sox9Cre
1.05932	0.952275	1.14012	0.853759
0.940566	0.728516	1.25015	0.841471
1.26654	0.707144	0.945108	0.677834
0.859909	0.65678	0.963994	0.949214
0.873662	0.590619	0.70062	0.912058
p Value		p Value
0.0237328		0.195321

## Sheet: Figure 3F ATP production
Stage	Control					Tfamf/f; Sox9Cre
P5	0.822061	1.22531	0.993791	0.795126	1.16372	0.625825	0.877729	0.596326	0.896806	0.702802		p Value	0.0443916

## Sheet: Figure 3H MLI quantification
Stage	Control (µm)			Miro1f/f; Sox9Cre (µm)
P3	68.6084	66.9026	64.8427	71.9725	71.127	65.0168		p Value	0.349915
P5	59.287	66.0812	65.4561	69.7947	64.4116	66.7183		p Value	0.275939
P7	51.9716	49.0755	46.6193	75.2135	66.9952	68.8033		p Value	0.00197594
P10	40.3646	39.5731	36.6673	72.729	81.5446	68.6084		p Value	0.00087844

## Sheet: Figure 3I Septal thickness
Stage	P5		P7
	Control (µm)	Miro1f/f; Sox9Cre (µm)	Control (µm)	Miro1f/f; Sox9Cre (µm)
	9.37195	6.22256	10.8049	9.38719
	10.6524	8.66768	9.64024	7.08537
	7.65244	7.73171	10.436	5.99085
	7.07317	6.82317	8.62195	8.03049
	9.77744	8.41158	9.77134	6.75
	7.91768	5.99085	9.52744	6.13719
	7.48475	8.39634	8.37805	8.39634
	9.18597	8.91158	8.17683	9.07927
	9.07012	6.57927	9.67378	7.73171
	8.89634	8.18597	9.96646	11.0793
	10.2866	9.80792	10.1402	11.4085
	7.51524	7.0061	9.03963	10.1372
	9.02744	9.89634	9.45731	8.62195
	8.00305	9.47256	11.7165	9.03354
	9.29573	9.03963	8.07317	6.78658
	8.21646	10.1189	9.50915	9.02744
	8.39329	8.73475	10.247	8.09146
	7.68902	7.75	8.70731	7.39329
	7.96341	6.34756	9.68292	9.59146
	9.28963	6.08232	10.122	6.93902
	9.69817	8.07317	10.872	7.87195
	10.247	9.66463	12.5701	6.44817
	7.02134	8.08231	11.4848	6.24085
	7.05488	8.35975	9.01219	10.2256
	8.80488	10.4299	11.0488	8.34756
	10.3811	8.67378	9.94207	8.92988
	9.10366	8.3689	8.4939	9.99085
	10.1037	8.18902	8.68597	9.64634
	9.80183	9.46646	8.08841	5.96341
	8.57317	9.14024	11.0213	6.7378
	10.2713	9.32317	8.73475	6.79268
	10.0762	8.76524	10.2195	7.54878
	9.96951	9.89329	9.56097	7.38719
	7.70732	10.311	10.2927	7.54573
	7.83537	10.5762	10.7591	8.53354
	7.93902	9.07012	7.57317	8.39634
	8.06707	8.72866	9.42683	7.17683
	8.5061	8.09146	8.15854	6.81098
	9.79268	10.2652	10.1951	7.51524
	8.57927	8.70731	8.60366	6.29573
	8.38415	8.67378	8.93597	6.27744
	8.79573	8.30488	8.57317	6.51219
	7.64939	8.64024	7.33537	6.57622
	8.3689	8.49695	12.6067	10.4329
	6.89024	8.73171	9.65854	9.6128
p Value	0.498389		1.53076e-07

## Sheet: Figure 3J Relative mtDNA ratio
16S rRNA/Hk2		mtND1/Hk2
Control	Miro1f/f; Sox9Cre	Control	Miro1f/f; Sox9Cre
1.46271	0.757673	1.22825	1.02238
0.579983	0.964791	0.971083	1.28986
1.05516	1.2507	0.956163	1.0672
0.817474	0.84265	1.01558	0.806754
1.08467	1.19625	0.82893	1.10939
p Value		p Value
0.989452		0.576073

## Sheet: Figure 3K Enzymatic activity
Complex Ⅰ		Complex Ⅳ
Control	Miro1f/f; Sox9Cre	Control	Miro1f/f; Sox9Cre
1.2796	0.893911	0.735209	1.01574
0.83328	1.09136	0.896955	0.815938
1.18977	1.00375	0.741264	0.888306
1.0247	1.02565	1.21266	1.03362
0.672656	1.30182	1.41391	1.40295
p Value		p Value
0.643606		0.857756

## Sheet: Figure 3L ATP production
Stage	Control					Miro1f/f; Sox9Cre
P5	0.773964	1.36008	1.126	0.891131	0.84883	1.06865	1.47077	0.916755	1.08339	1.04746		p Value	0.433671
