# Supplementary material for: Acquisition of cellular properties during alveolar formation requires differential activity and distribution of mitochondria
Source: eLife. 2022 Apr 6;11:e68598. doi: 10.7554/eLife.68598 (PMC9183236; doi:10.7554/eLife.68598)
Supplement: Figure 4—figure supplement 1—source data 1. [file elife-68598-fig4-figsupp1-data1.xlsx]

## Sheet: Fig4 S1C Lentiviral tranduction
Tfam deficient cells		Miro1 deficient cells
Control	Tfamf/f; PdgfraCre	Control	Miro1f/f; PdgfraCre
0.86	0.77	0.88	0.87
0.72	0.91	0.96	0.93
0.89	0.83	0.92	0.92
0.8	0.81	0.86
p Value		p Value
0.802422		0.95627
