# Supplementary material for: Acquisition of cellular properties during alveolar formation requires differential activity and distribution of mitochondria
Source: eLife. 2022 Apr 6;11:e68598. doi: 10.7554/eLife.68598 (PMC9183236; doi:10.7554/eLife.68598)
Supplement: Figure 4—source data 1. [file elife-68598-fig4-data1.xlsx]

## Sheet: Figure 4D EdU quantification
	Control (ratio)			Tfamf/f; Sox9Cre (ratio)
P5	0.3145	0.2567	0.2826	0.3122	0.3124	0.2544		pValue	0.758664
P7	0.2832	0.3128	0.2215	0.1632	0.2145	0.1747		pValue	0.0466361
P10	0.1985	0.2345	0.2543	0.1345	0.1766	0.1534		pValue	0.0218539

## Sheet: Figure 4E qPCR quantification
Gene	Control			Tfamf/f Sox9Cre
Pdgfa	1.14242	1.04774	0.80984	0.955805	0.723135	1.33984		p Value	0.977124
Pdgfra	1.12624	1.06475	0.80902	0.922978	0.811496	0.92638		p Value	0.338972
Acta2	0.951086	1.17571	0.873203	0.615768	0.678965	0.803711		p Value	0.0473242
Eln	1.01604	1.09336	0.890598	0.691236	0.600894	0.410316		p Value	0.0131343

## Sheet: Figure 4F Ligand secretion
	Control (ratio)	Tfam deficient cells (ratio)
repeat 1	0.769234	0.668852
repeat 2	0.990548	0.68437
repeat 3	1.07633	0.700225
repeat 4	1.16389	0.690362
	p Value
	0.0101128

## Sheet: Figure 4I EdU quantification
	Control (ratio)			Miro1f/f; Sox9Cre (ratio)
P7	0.2315	0.2187	0.2711	0.1945	0.1784	0.1931			p Value	0.0355244
P10	0.2214	0.1987	0.2456	0.1745	0.1233	0.1524			p Value	0.0232198

## Sheet: Figure 4J qPCR quantification
Gene	Control			Miro1f/f; Sox9Cre
Pdgfa	0.935773	1.18891	0.875321	0.901641	1.09736	0.985063		p Value	0.964308
Pdgfra	1.01831	0.807505	1.17418	1.10085	0.714873	0.897861		p Value	0.568842
Acta2	1.08675	1.04359	0.869662	0.828558	0.642822	0.731879		p Value	0.0357704
Eln	1.13586	1.03558	0.828556	0.707752	0.607245	0.633791		p Value	0.0212951

## Sheet: Figure 4K ligand secretion
	Control (ratio)	Miro1 deficient cells (ratio)
repeat 1	0.987171	0.600576
repeat 2	0.986288	0.833656
repeat 3	0.95828	0.820034
	1.06826
	p Value
	0.0156227
