# Supplementary material for: Acquisition of cellular properties during alveolar formation requires differential activity and distribution of mitochondria
Source: eLife. 2022 Apr 6;11:e68598. doi: 10.7554/eLife.68598 (PMC9183236; doi:10.7554/eLife.68598)
Supplement: Figure 5—figure supplement 3—source data 1. [file elife-68598-fig5-figsupp3-data1.xlsx]

## Sheet: Figure 5 S3B MLI quantification
Stage	Control (µm)			Tfamf/f; Dermo1Cre (µm)
P5	55.2343	58.345	53.456	73.245	71.4567	69.778		p Value	0.00135065
P28	34.4632	39.5658	41.4657	72.4567	69.6788	84.5657		p Value	0.00647529

## Sheet: Figure 5 S3D MLI quantification
Stage	Control (µm)			Lrpprcf/f; PDGFRaCre (µm)
P21	37.4568	35.6883	42.4677	79.5677	88.2368	71.6789		p Value	0.00135689
P30	39.492	41.5973	37.5291	83.2456	81.5657	72.4677		p Value	0.000368484
