# Supplementary material for: Acquisition of cellular properties during alveolar formation requires differential activity and distribution of mitochondria
Source: eLife. 2022 Apr 6;11:e68598. doi: 10.7554/eLife.68598 (PMC9183236; doi:10.7554/eLife.68598)
Supplement: Figure 5—source data 1. [file elife-68598-fig5-data1.xlsx]

## Sheet: Figure 5B MLI quantification
	Control (µm)			Tfamf/f; PDGFRaCre (µm)
P0	77.9992	81.271	83.6572	76.6416	75.9209	83.3692		p Value	0.469299
P2	77.8738	74.1769	80.461	75.2135	77.1298	78.8884		p Value	0.851874
P3	66.0812	71.9725	75.3305	82.7991	82.3767	88.5512		p Value	0.0189425
P5	59.2146	61.3133	65.9014	81.5446	87.9083	93.8711		p Value	0.00715715

## Sheet: Figure 5C Septal thickness
Stage	P2		P3
	Control (µm)	Tfamf/f; PdgfraCre (µm)	Control (µm)	Tfamf/f; PdgfraCre (µm)
	3.96036	4.43293	8.22561	3.51829
	4.375	5.625	8.94207	4.64939
	5.09756	4.92683	6.02439	4.68598
	4.69207	6.60061	5.38719	5.59451
	4.16158	5.44817	6.05793	4.79573
	5.34146	4.44817	5.65853	4.10671
	5.79573	4.10976	9.03963	5.95732
	3.72866	7.17683	8.77134	5.35366
	6.78049	5.07622	8.00305	4.96646
	6.26219	6.97256	7.78658	4.67683
	7.34146	5.55183	6.02439	3.75915
	7.06098	6.70122	6.57317	5.25915
	6.03353	6.02439	6.94817	5.10976
	6.56707	5.17683	7.67683	4.7378
	5.625	7.21037	7.03049	4.80488
	6.7561	4.68902	7.3689	5.41463
	6.02439	6.77744	6.76219	6.57012
	6.21037	4.8628	6.05793	6.78049
	4.59146	6.53963	6.63415	4.55183
	6.14329	4.40854	7.35975	5.48171
	5.34756	5.27134	7.12195	5.05488
	4.20122	5.00305	7.72866	6.03963
	4.27744	6.12195	7.0061	5.60671
	5.64634	4.70732	7.67683	6.54573
	5.35671	4.68293	7.57622	7.53658
	5.1189	5.32927	6.45427	4.85671
	5.92988	4.9939	6.72866	6.01524
	4.53963	5.24695	6.57317	5.12805
	4.67683	4.4939	7.58232	5.60061
	5.9878	4.26524	7.76829	6.75915
	5.44817	4.99085	6.9939	6.45427
	6.22866	4.98171	9.07317	6.54878
	6.50915	4.80183	9.53049	5.02744
	5.34756	3.89024	9.0061	5.60366
	4.9939	5.59451	7.92073	6.51524
	6.96341	7.05793	8.30488	6.09451
	5.99085	5.9939	9.20122	5.32927
	4.92988	5.32317	8.95731	4.53354
	6.22866	4.80488	7.98475	8.30488
	6	4.43598	6.88415	7.15549
	5.60671	4.53354	8.04573	5.17988
	3.80793	5.93598	8.51829	6.50915
	4.80488	4.9939	6.63719	4.9939
	4.46646	6.63415	6.93293	4.66158
	5.56098	6.29573	6.14939	5.96037
p Value	0.699012		7.23625e-14

## Sheet: Figure 5D Relative mtDNA ratio
16S rRNA/Hk2		mtND1/Hk2
Control	Tfamf/f; PdgfraCre	Control	Tfamf/f; PdgfraCre
1.34116	0.834779	1.23092	0.693069
0.912095	0.813723	0.947876	0.894703
0.986203	0.631924	1.14131	0.691312
0.860958	0.728125	0.784984	0.764443
0.899579	0.544537	0.894907	0.691403
p Value		p Value
0.0277474		0.0328885

## Sheet: Figure 5E Enzymatic activity
Complex Ⅰ		Complex Ⅳ
Control	Tfamf/f; PdgfraCre	Control	Tfamf/f; PdgfraCre
1.20372	0.703728	1.33019	0.547911
0.873041	0.767005	1.09383	0.68487
1.21637	0.776051	0.786843	0.477186
0.934725	0.530964	0.931855	0.565464
0.772139	0.567883	0.857288	0.835788
p Value		p Value
0.0170072		0.0141435

## Sheet: Figure 5F ATP production
Stage	Control					Tfamf/f; PdgfraCre
P5	0.651975	0.968183	1.29586	0.974045	1.10994	0.659028	0.795464	0.593634	0.480546	0.645576		p Value	0.0217336

## Sheet: Figure 5H MLI quantification
	Control (µm)			Miro1f/f; PDGFRaCre (µm)
P3	62.5808	67.2743	60.3207	67.8396	56.0619	66.9952		p Value	0.958964
P5	53.463	58.8548	55.1052	55.1052	57.0524	60.8511		p Value	0.467729
P7	43.2864	42.3775	46.1749	52.5923	49.7816	54.3021		p Value	0.00945665
P10	40.4657	37.0601	36.5566	65.4561	71.4417	60.2456		p Value	0.00703085

## Sheet: Figure 5I Septal thickness
Stage	P5		P7
	Control (µm)	Miro1f/f; PdgfraCre (µm)	Control (µm)	Miro1f/f; PdgfraCre (µm)
	7.82012	9.89634	12.4238	8.52744
	8.03049	9.09146	10.8079	8.5
	6.50915	10.314	11.5457	6.84756
	9.59756	9.37805	12.4146	8.12195
	8.67378	9.19512	10.2409	6.8628
	10.3598	9.55792	11.5305	9.58841
	9.03963	8.05488	9.07317	7.96646
	9.625	6.88415	11.8628	10.9024
	9.59146	9.03963	11.0579	6.94512
	9.07012	8.31707	12.7317	12.6768
	8.53049	7.6189	9.65549	10.2652
	9.32317	8.34451	9.10671	7.49085
	8.85671	9.61585	10.2409	6.70122
	8.78658	8.51219	11.5335	8.22561
	7.09756	8.70731	10.1799	9.03963
	10.1372	9.09451	10.4909	9.12805
	7.8811	8.64024	11.6921	10.936
	9.74085	7.94512	9.10671	9.68292
	8.37805	6.63415	9.14024	5.76829
	9.59146	9.59756	9.41158	9.39329
	9.60061	8.29878	9.72866	9.68902
	9.34451	9.625	9.92378	6.81098
	8.40549	8.68292	12.9787	8.65549
	7.71951	9.10671	8.91463	5.99085
	8.71646	9.59756	11.436	11.0915
	8.31402	6.87805	9.03963	7.20732
	9.09756	8.93597	9.625	9.58841
	7.43293	8.35671	12.1921	6.35061
	8.72256	8.01524	12.6921	6.55183
	8.16463	8.64024	11.8689	6.8811
	8.94817	8.68597	9.58841	8.50915
	9.01829	7.42073	10.2043	8.46341
	8.5	9.03963	11.3689	6.82012
	8.19207	6.87805	11.2561	9.39634
	8.84451	8.5	11.8689	7.82622
	9.35061	9.03049	11.7012	8.31097
	9.70122	9.58841	9.625	6.57317
	10.1433	7.80183	11.5305	9.125
	9.32012	9.89329	11.1128	7.88415
	9.70122	9.88719	9.90244	11.1128
	9.5	7.70122	10.3262	9.90549
	8.17683	8.33536	9.6189	11.6585
	8.67378	8.52439	12.6768	11.2683
	9.03658	8.72256	8.78963	8.51524
	8.20731	9.56707	9.59451	10.1341
p Value	0.370307		2.568e-09

## Sheet: Figure 5J Relative mtDNA ratio
16S rRNA/Hk2		mtND1/Hk2
Control	Miro1f/f; PdgfraCre	Control	Miro1f/f; PdgfraCre
1.17747	1.20992	0.746608	0.954269
0.979665	0.730914	0.9381	1.08725
0.899806	0.879556	1.18325	0.831291
0.785726	1.14701	1.02329	0.895661
1.15733	0.83413	1.10875	0.945718
p Value		p Value
0.748341		0.532199

## Sheet: Figure 5K Enzymatic activity
Complex Ⅰ		Complex Ⅳ
Control	Miro1f/f; PdgfraCre	Control	Miro1f/f; PdgfraCre
0.775374	0.910544	1.3923	0.968559
1.1578	1.24891	0.96856	0.8697
0.392464	0.648543	0.854076	0.697511
1.22437	0.835221	0.71276	0.616311
1.44999	1.46702	1.0723	1.39242
p Value		p Value
0.928615		0.622835

## Sheet: Figure 5L ATP production
Stage	Control					Miro1f/f; PdgfraCre
P5	1.16276	0.741976	1.41602	1.01002	0.669223	0.942424	1.31788	1.23628	0.52236	0.633669		pValue	0.748331
