# Supplementary material for: Acquisition of cellular properties during alveolar formation requires differential activity and distribution of mitochondria
Source: eLife. 2022 Apr 6;11:e68598. doi: 10.7554/eLife.68598 (PMC9183236; doi:10.7554/eLife.68598)
Supplement: Figure 6—figure supplement 1—source data 1. [file elife-68598-fig6-figsupp1-data1.xlsx]

## Sheet: Fig 6 S1B Mitochondrial shape
	Control			Tfam-deficient
Tubular	0.95	0.97	0.89	0.12	0.19	0.08		p Value	6.44258e-05
Short tubular	0.04	0.03	0.1	0.34	0.45	0.37		p Value	0.00200052
Fragment	0.01	0	0.01	0.54	0.36	0.55		p Value	0.00152308

## Sheet: Fig 6 S1D Mitochondrial shape
	Control			Miro1-deficient
Tubular	0.88	0.94	0.96	0.79	0.92	0.89		p Value	0.275924
Short tubular	0.12	0.06	0.04	0.19	0.08	0.1		p Value	0.301279
Fragment	0	0	0	0.02	0	0.01		p Value	0.225403
