# Supplementary material for: Acquisition of cellular properties during alveolar formation requires differential activity and distribution of mitochondria
Source: eLife. 2022 Apr 6;11:e68598. doi: 10.7554/eLife.68598 (PMC9183236; doi:10.7554/eLife.68598)
Supplement: Figure 6—figure supplement 2—source data 1. [file elife-68598-fig6-figsupp2-data1.xlsx]

## Sheet: Figure 6 S2B Tfam rescue
Tfam deficient			Tfam deficient + TFAM-FLAG
0.54267	0.42562	0.66239	0.89652	0.96348	0.84864		pValue	0.0193813

## Sheet: Figure 6 S2D Miro1 rescue
Miro1 deficient			Miro1 deficient + MIRO1-FLAG
0.63297	0.58663	0.72456	0.91346	0.96882	0.87583		pValue	0.00757926
