# Supplementary material for: Acquisition of cellular properties during alveolar formation requires differential activity and distribution of mitochondria
Source: eLife. 2022 Apr 6;11:e68598. doi: 10.7554/eLife.68598 (PMC9183236; doi:10.7554/eLife.68598)
Supplement: Figure 6—source data 1. [file elife-68598-fig6-data1.xlsx]

## Sheet:  Figure 6B EdU quantification
Stage	Control (rate)			Tfamf/f; PDGFRaCre (rate)
P2	0.2134	0.2642	0.1956	0.1923	0.2141	0.2215		p Value	0.55241
P3	0.2086	0.2341	0.194	0.13	0.161	0.115		p Value	0.0132827
P5	0.2586	0.2341	0.334	0.1532	0.1861	0.1315		p Value	0.0390591

## Sheet: Figure 6C qPCR quantification
Gene	Control			Tfamf/f; PDGFRaCre
Pdgfra	0.854646	1.11675	1.02861	0.760498	0.675568	0.449081		p Value	0.0386823
Acta2	1.00286	0.803764	1.19338	0.734619	0.375103	0.548402		p Value	0.0434818
Eln	1.09491	1.09495	0.810142	0.71335	0.462032	0.631123		p Value	0.0324619

## Sheet: Figure 6D cell migration
	Control (rate)	Tfam deficient cell (rate)
mouse 1	0.765	0.386
mouse 2	0.901	0.643
mouse 3	0.804	0.512
p Value	0.0334006

## Sheet:  Figure 6F EdU quantification
Stage	Control (rate)			Miro1f/f; PDGFRaCre (rate)
P5	0.2356	0.2615	0.3154	0.3321	0.2314	0.2712		p Value	0.8538
P10	0.2212	0.1672	0.1893	0.1332	0.1563	0.1145		p Value	0.0464509

## Sheet: Figure 6G qPCR quantification
Gene	Control			Miro1f/f; PDGFRaCre
Pdgfra	0.923945	0.83836	1.23769	0.922232	1.04874	0.74319		p Value	0.560589
Acta2	0.912177	1.02543	1.06239	1.1198	0.704661	0.794768		p Value	0.39694
Eln	0.861946	0.949004	1.18905	0.751859	0.693009	0.654865		p Value	0.0420554

## Sheet: Figure 6H cell migration
	Control (rate)	Miro1 deficient cells (rate)
mouse 1	0.892	0.687
mouse 2	0.912	0.788
mouse 3	0.954	0.756
p Value	0.011876
