# Supplementary material for: Acquisition of cellular properties during alveolar formation requires differential activity and distribution of mitochondria
Source: eLife. 2022 Apr 6;11:e68598. doi: 10.7554/eLife.68598 (PMC9183236; doi:10.7554/eLife.68598)
Supplement: Figure 7—source data 1. [file elife-68598-fig7-data1.xlsx]

## Sheet: Figure 7C MLI quantification
	Control (µm)	CAGCreER;Raptorf/f (µm)
Mouse 1	37.4309	63.2132
Mouse 2	35.47	44.286
Mouse 3	33.6671	45.0721
Mouse 4	38.2773	55.0972
Mouse 5	35.7895	50.6764
p Value	0.00984017

## Sheet: Figure 7E P-S6 S6 ratio
	Control								CAGCreER Raptor
p-S6/S6	1.04663	0.973585	1.02313	0.956659	1.01751	0.982486	0.93702	1.06298	0.802803	0.626397	0.826081	0.788521	0.713126
S6	1.09631	0.932294	0.887136	1.04157	1.0818	1.0027	1.03004	0.928156	1.20938	1.22879	0.877871	1.10178	0.908826
p-S6/S6	p Value	1.78585e-05
S6	p Value	0.346789

## Sheet: Figure 7F Relative mtDNA ratio
	16S rRNA/Hk2		mtND1/Hk2
	Control	CAGCreER; Raptor	Control	CAGCreER; Raptor
mouse 1	0.929713	0.746246	1.11943	0.893477
mouse 2	1.13481	0.653875	0.951902	0.664743
mouse 3	0.811646	0.619541	1.05596	0.704806
mouse 4	1.22396	0.831861	0.906856	0.777096
mouse 5	0.899867	0.701681	0.965852	0.612642
	p VALUE		p VALUE
	0.0157584		0.0028178
