# Supplementary material for: Acquisition of cellular properties during alveolar formation requires differential activity and distribution of mitochondria
Source: eLife. 2022 Apr 6;11:e68598. doi: 10.7554/eLife.68598 (PMC9183236; doi:10.7554/eLife.68598)
Supplement: Figure 8—figure supplement 3—source data 1. [file elife-68598-fig8-figsupp3-data1.xlsx]

## Sheet: Figure 8 S3A Epithelial cell
MIRO1 knockdown q PCR			shControl			shMIRO1
			1.08583	0.895939	1.01823	0.342483	0.454596	0.556302		p Value	0.00282659
PDGFA secretion assay			shControl			shMIRO1			shMIRO1 + m MIRO1-FLAG
			0.959929	0.918842	1.12123	0.755999	0.623645	0.747281	1.00881	0.941758	0.980206
					p Value	0.0223041		p Value	0.0129285

## Sheet: Figure 8 S3B Fibroblast cell
MIRO1 knockdown q PCR			shControl			shMIRO1
			0.864708	1.1675	0.967793	0.515007	0.528551	0.424271		p Value	0.0190559
Cell migration assay			shControl			shMIRO1			shMIRO1 + m MIRO1-FLAG
			0.89703	0.92391	0.95064	0.64457	0.61234	0.50542	0.89431	0.79095	0.91387
					p Value	0.00858024		p Value	0.00816186
