# Supplementary material for: Acquisition of cellular properties during alveolar formation requires differential activity and distribution of mitochondria
Source: eLife. 2022 Apr 6;11:e68598. doi: 10.7554/eLife.68598 (PMC9183236; doi:10.7554/eLife.68598)
Supplement: Figure 8—source data 1. [file elife-68598-fig8-data1.xlsx]

## Sheet: Figure 8B relative mtDNA ratio
	tRNA-Leu/β2M		16S rRNA/β2M
	Normal	Emphysema	Normal	Emphysema
repeat 1	0.949707	0.905627	0.867071	0.751004
repeat 2	0.72791	0.483108	0.743809	0.515151
repeat 3	0.90469	0.905278	1.04217	0.807695
repeat 4	0.942015	0.807586	0.830963	0.667083
repeat 5	0.998206	0.850592	0.902326	0.762133
repeat 6	0.908318	0.839165	1.09438	0.921576
repeat 7	1.10551	0.149164	1.25675	1.0169
repeat 8	0.84473	0.992392	1.21686	0.82297
repeat 9	0.854263	0.821644	1.05061	0.827597
repeat 10	1.49534	1.24709	1.05518	0.759142
repeat 11	0.776974	0.703713	0.582195	0.594864
repeat 12	0.57692	0.90431	0.606312	0.929307
repeat 13	1.38025	0.862655	1.39671	0.806115
repeat 14	1.1594	1.0841	0.960028	1.2921
repeat 15	1.37576	0.915069	1.39463	0.932083
repeat 16	0.948757	0.679984	1.04992	0.860786
repeat 17	1.33257	0.557407	0.825919	1.25224
repeat 18	1.16576	0.605075	0.913425	0.974789
repeat 19	1.11991	0.649176	1.06928	0.835761
repeat 20	0.766805	0.92284	1.10123	1.04153
repeat 21	0.907802	0.866342	1.00001	0.907352
repeat 22	0.75839	0.516077	1.04021	0.789588
	p Value		p Value
	0.00434544		0.0312559

## Sheet: Figure 8C Lung epithelial cell
TFAM knockdown q PCR			shControl			shTFAM
			0.892716	1.12612	0.981164	0.401162	0.42085	0.513639		p Value	0.00554294
PDGFA secretion assay			shControl			shTFAM			shTFAM + m TFAM-FLAG
			0.959502	0.970357	1.07014	0.741805	0.702928	0.537313	0.811516	1.039	0.894457
					p Value	0.0161708		p Value	0.0498449

## Sheet: Figure 8D Lung fibroblast cell
TFAM knockdown q PCR			shControl			shTFAM
			1.30649	0.74861	0.944896	0.338418	0.535735	0.53932		p Value	0.0399924
Cell migration assay			shControl			shTFAM			shTFAM + m TFAM-FLAG
			0.98745	0.91343	0.94344	0.56382	0.49087	0.64449	0.79823	0.81346	0.90873
					p Value	0.00510675		p Value	0.00953005

## Sheet: Figure 8E TFAM expression
	Control	Emphysema
repeat 1	0.516226	0.971439
repeat 2	0.939132	0.870402
repeat 3	1.26452	0.948608
repeat 4	1.14482	0.759225
repeat 5	1.22065	1.12734
repeat 6	1.12121	1.07865
repeat 7	1.2575	1.03079
repeat 8	1.07022	0.784991
repeat 9	0.89813	0.859737
repeat 10	1.18929	0.814461
repeat 11	0.906888	0.57899
repeat 12	0.870747	0.761917
repeat 13	1.04059	0.897317
repeat 14	1.24828	0.925558
repeat 15	0.911897	0.768281
repeat 16	0.821006	1.00054
repeat 17	0.669767	0.826081
repeat 18	1.04398	0.859884
repeat 19	0.900409	0.62996
repeat 20	0.965654	0.601547
repeat 21	0.999072	1.07174
	p Value
	0.0173495

## Sheet: Figure 8G relative P-S6 and S6
	S6 expression			P-S6 expression
	Control	Emphysema		Control	Emphysema
repeat 1	1.23226	0.669803		1.45208	0.813325
repeat 2	1.01919	1.34478		1.31067	0.811011
repeat 3	1.02536	1.16146		0.857826	0.79686
repeat 4	0.975941	1.30277		0.817017	0.58032
repeat 5	1.13489	0.848958		0.910999	0.89792
repeat 6	0.984065	1.2915		0.755154	0.954846
repeat 7	0.628291	1.2103		0.896254	0.833633
repeat 8	1.40381	0.92079		0.954733	1.36572
repeat 9	0.857127	1.06656		1.11199	1.00989
repeat 10	1.03256	1.21379		1.1956	1.38709
repeat 11	0.865768	0.865695		0.635789	1.16855
repeat 12	0.860414	0.993406		0.775503	0.729089
repeat 13	1.07906	0.841537		0.758455	0.945768
repeat 14	0.901267	0.804752		1.56793	0.934463
repeat 15	0.861028	0.790342		0.687761	0.93726
repeat 16	0.767838	0.884321		1.11409	1.30264
repeat 17	1.0493	0.83363		1.23239	0.985482
repeat 18	1.20751	1.06854		1.49089	0.881422
repeat 19	1.11894	0.900178		1.02152	1.19295
repeat 20	1.06158	0.993449		0.601231	1.64457
repeat 21	0.933814	0.911862		0.85212	1.13273
	p Value			p Value
	0.945391			0.862679
